# Supplementary material for: Ex vivo anti-malarial drug susceptibility of Plasmodium falciparum isolates from pregnant women in an area of highly seasonal transmission in Burkina Faso
Source: Springer Nature journal article supplement (doi:10.1186/s12936-015-0769-1), 2015-06-18
Supplement: MOESM1 [file 9761410]

Additional file: Figure S1 Scatter of the IC50 values with geometric mean and the resistance cutoff (where available) of each drug

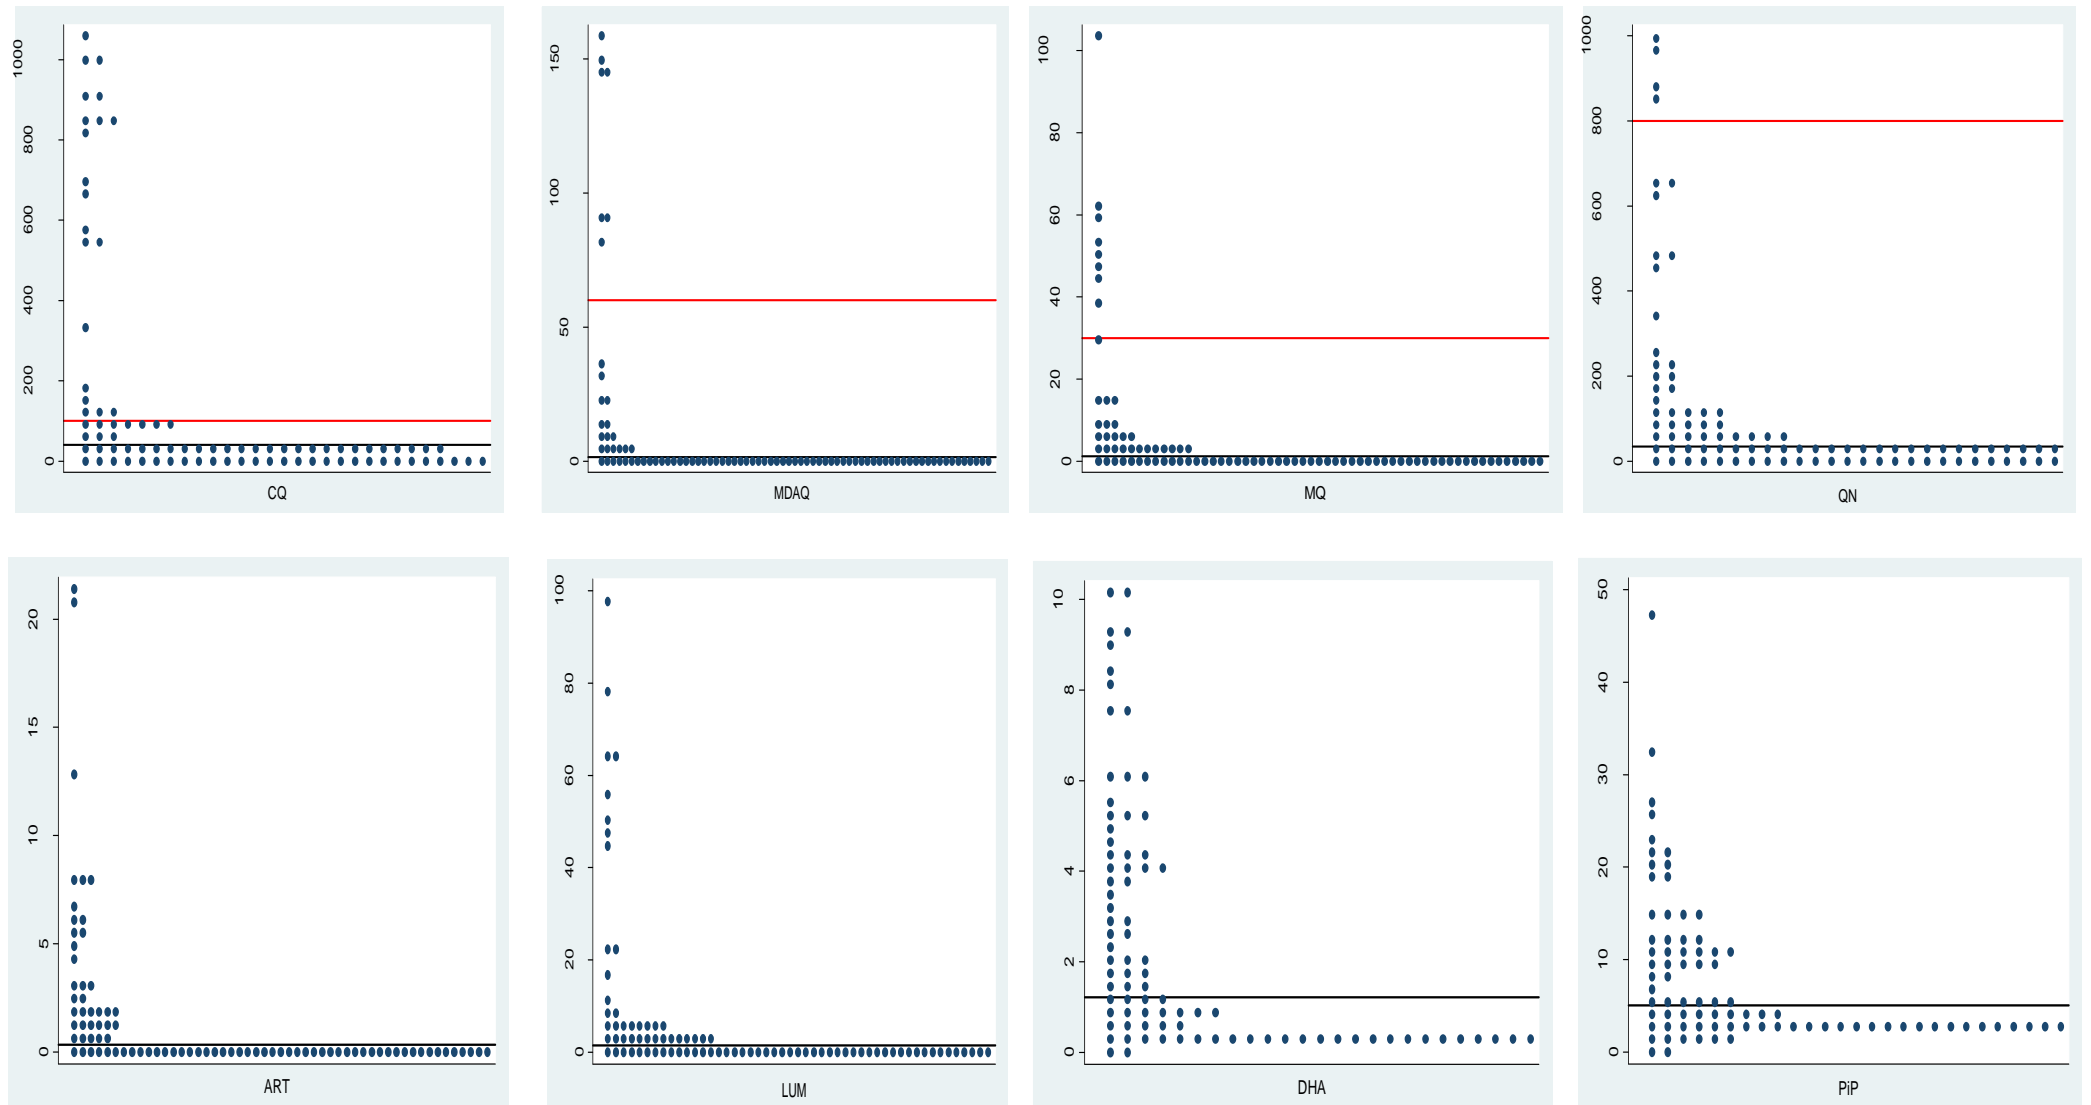

— Geometric means IC 50  
— Resistance threshold
